# Supplementary material for: Morphology and crystal structure dependent pseudocapacitor performance of hydrated WO3 nanostructures
Source: Royal Society of Chemistry journal article supplement (doi:10.1039/d0ma00518e), 2020-01-01
Supplement: d0ma00518e1.pdf [file d0ma00518e1.pdf]

## **Supporting Information**

### **Morphology and crystal structure dependent supercapacitor performance of hydrated WO<sub>3</sub> nanostructures**

Shobhnath P. Gupta,<sup>a</sup> Harishchandra H. Nishad,<sup>a</sup> Vandana B. Patil,<sup>b</sup> Sanjay D. Chakane,<sup>c</sup>  
Mahendra A. More,<sup>d</sup> Dattatray J. Late,<sup>e</sup> Pravin S. Walke<sup>a,\*</sup>

<sup>a</sup>National Centre for Nanoscience's and Nanotechnology, University of Mumbai, Mumbai-400098, India

<sup>b</sup>Department of Physics, Dr. D.Y. Patil Institute of Engineering Management & Research, Akurdi, Pimpri-Chinchwad, Maharashtra 411044, India

<sup>c</sup>Department of Physics, Arts, Science and Commerce College, Indapur, Pune-413106, Affiliated to Savitribai Phule Pune University, Pune-411007, India

<sup>d</sup>Department of Physics, Savitribai Phule Pune University, Pune-411007, India

<sup>e</sup>Centre for Nanoscience & Nanotechnology, Amity University, Mumbai-410206, India

**Corresponding Author: Prof. P. Walke,**

**Email:** [shivshripsw@gmail.com](mailto:shivshripsw@gmail.com), [pravin.w@nano.mu.ac.in](mailto:pravin.w@nano.mu.ac.in)

Contents:

Figures S1 to S5

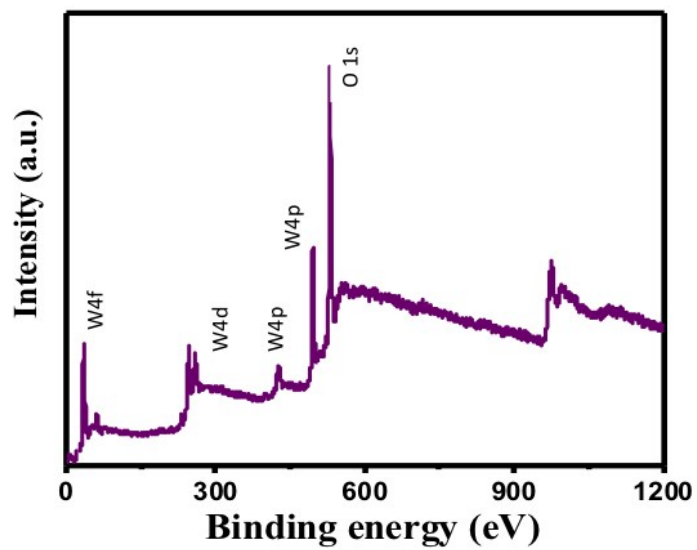

Figure S1. XPS Survey scan of WO<sub>3</sub> slab (W110).

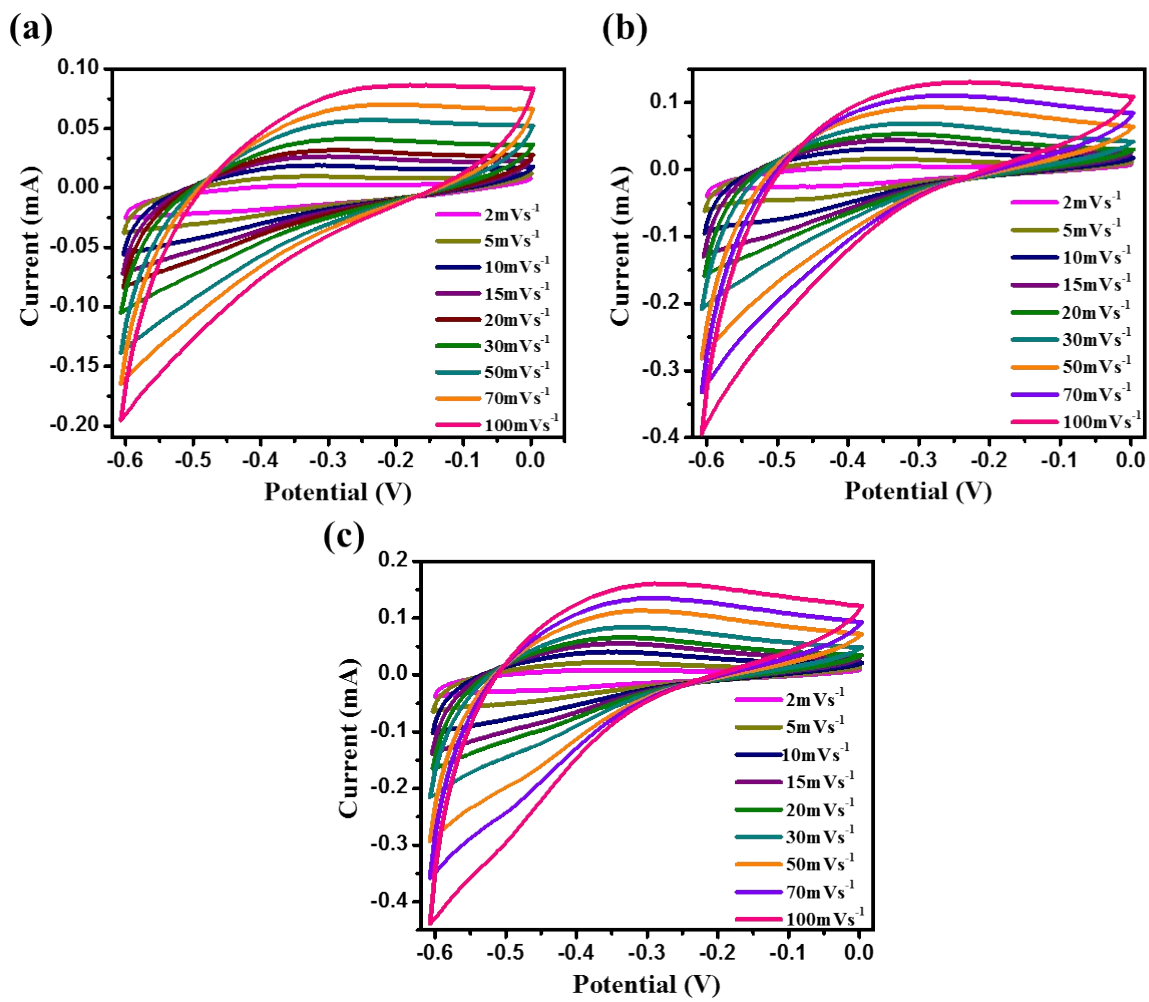

Figure S2. CV curves of (a) W70, (b) W90 and (c) W110.

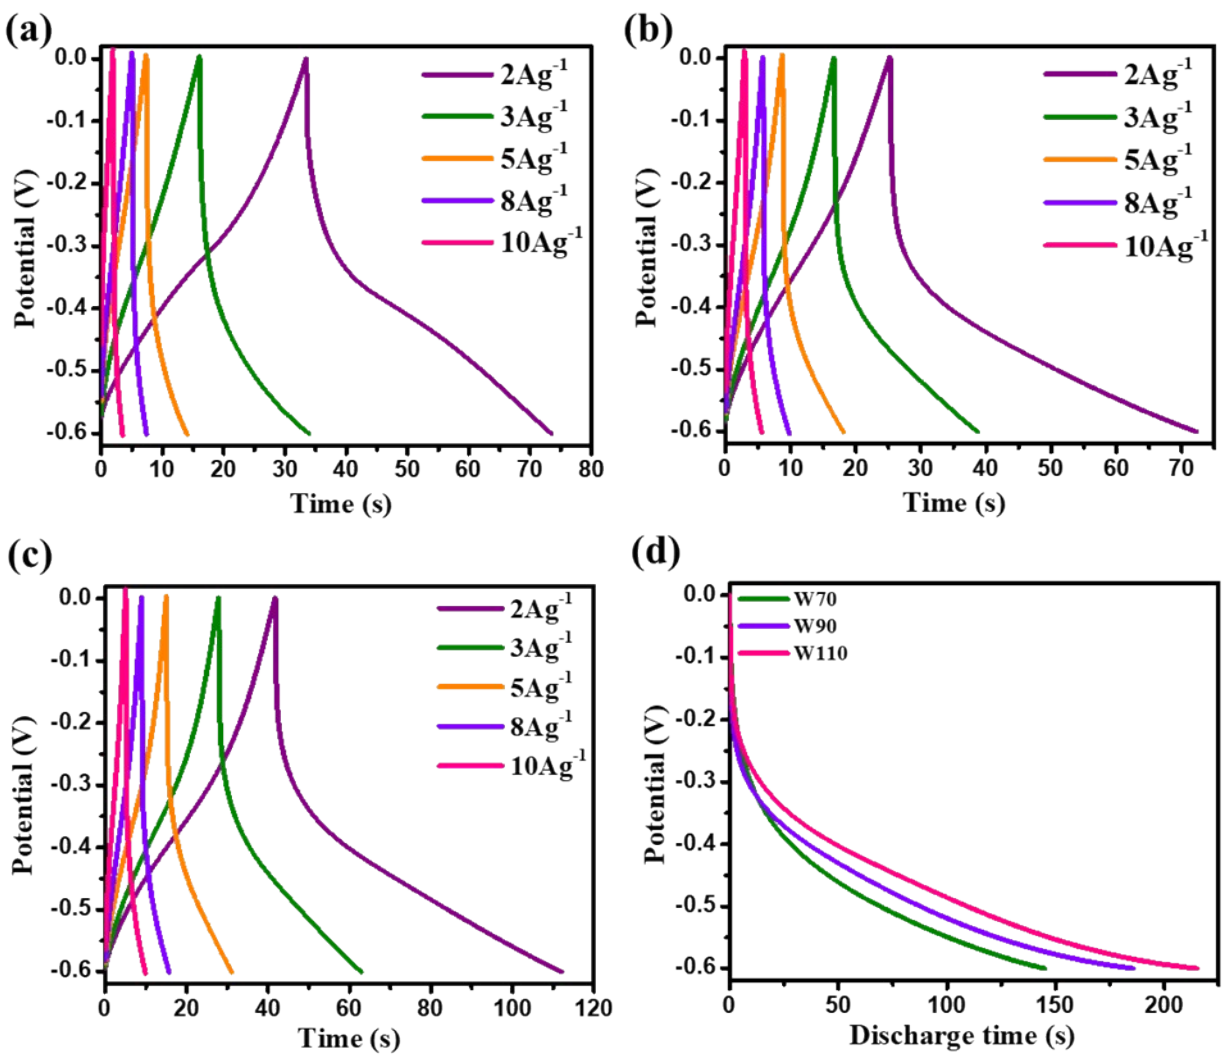

Figure S3. Charge-discharge curve of (a) W70, (b) W90, (c) W110 and (d) discharge time at current density of 1 Ag<sup>-1</sup>.

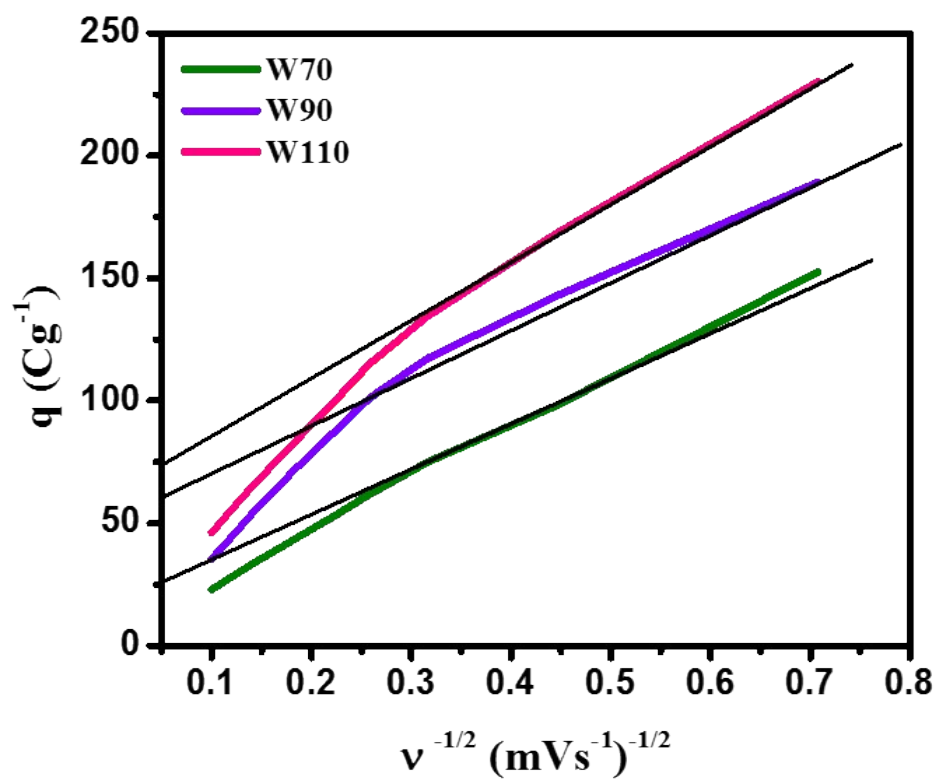

Figure S4. Dependence of  $q$  and  $v^{-1/2}$  of nanoslabs (electrode W110).

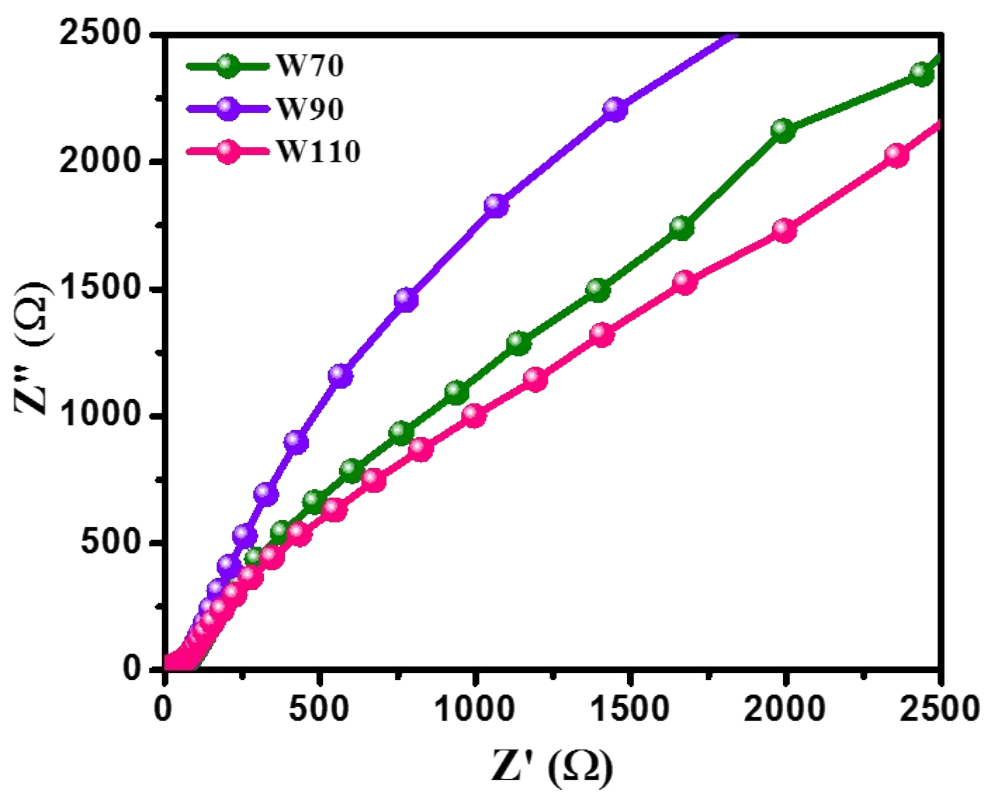

Figure S5. Impedance spectra of electrodes W70, W90 and W110.
